# Supplementary material for: Acyclic cucurbit[n]uril-based nanosponges significantly enhance the photodynamic therapeutic efficacy of temoporfin in vitro and in vivo
Source: Royal Society of Chemistry journal article supplement (doi:10.1039/d3tb01422c), 2023-01-01
Supplement: d3tb01422c1.pdf [file d3tb01422c1.pdf]

## Supporting Information

### Acyclic Cucurbit[*n*]uril-Based Nanosponges Significantly Enhance the Photodynamic Therapeutic Efficacy of Temoporfin *in Vitro* and

#### *In Vivo*

Zizhen Zhao,<sup>a</sup> Jingyu Yang,<sup>a</sup> Yamin Liu,<sup>c</sup> Shuyi Wang,<sup>a,b</sup> Wei Zhou,<sup>a</sup>  
Zhan-Ting Li,<sup>a</sup> Dan-Wei Zhang,<sup>a</sup> Da Ma<sup>\*b</sup>

<sup>a</sup>Department of Chemistry, Fudan University, 220 Handan Road, Shanghai, 200433, China.

<sup>b</sup>School of Pharmaceutical Engineering & Institute for Advanced Studies, Taizhou University, 1139 Shifu Road, Taizhou, Zhejiang 318000, China.

<sup>c</sup>Frontiers Science Center for Transformative Molecules, School of Chemistry and Chemical Engineering, National Center for Translational Medicine, Shanghai Jiao Tong University, Shanghai, 200240, China

### Table of Contents

|                                |    |
|--------------------------------|----|
| 1. Synthetic Procedure .....   | S2 |
| 2. Characterization .....      | S3 |
| 3. Host-Guest Chemistry .....  | S5 |
| 4. <i>In vitro</i> Study ..... | S7 |
| 5. <i>In Vivo</i> Study .....  | S9 |

## Synthetic Procedures

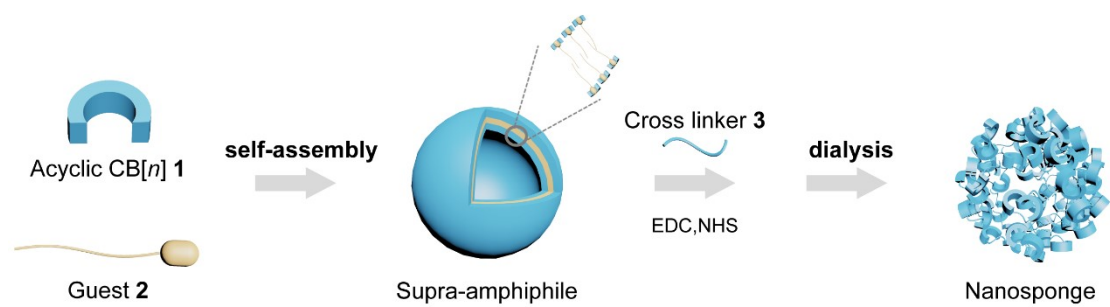

**Fig. S1.** Synthetic procedures of nanosponges.

## Characterization

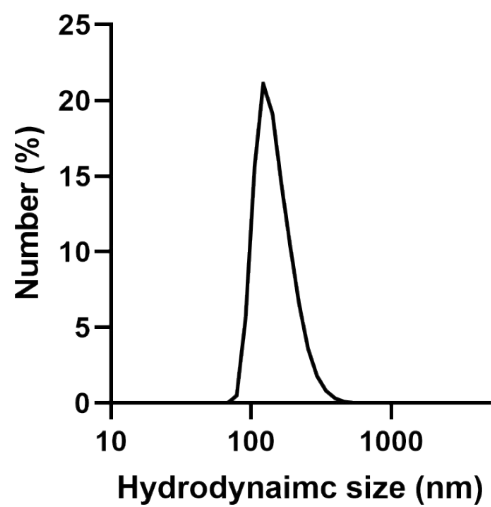

**Fig. S2.** DLS profile of the supra-amphiphiles with an average hydrodynamic size of 152 nm.

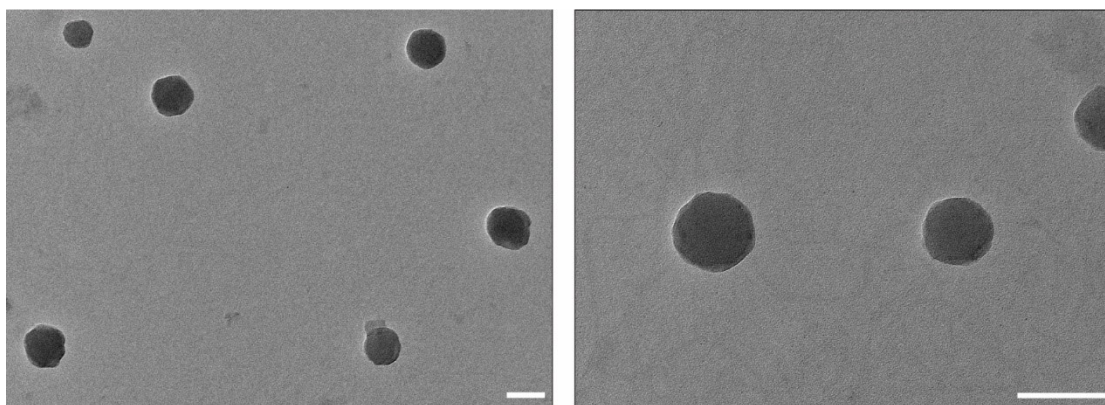

**Fig. S3.** TEM image of nanosponges. Scale bar: 100 nm.

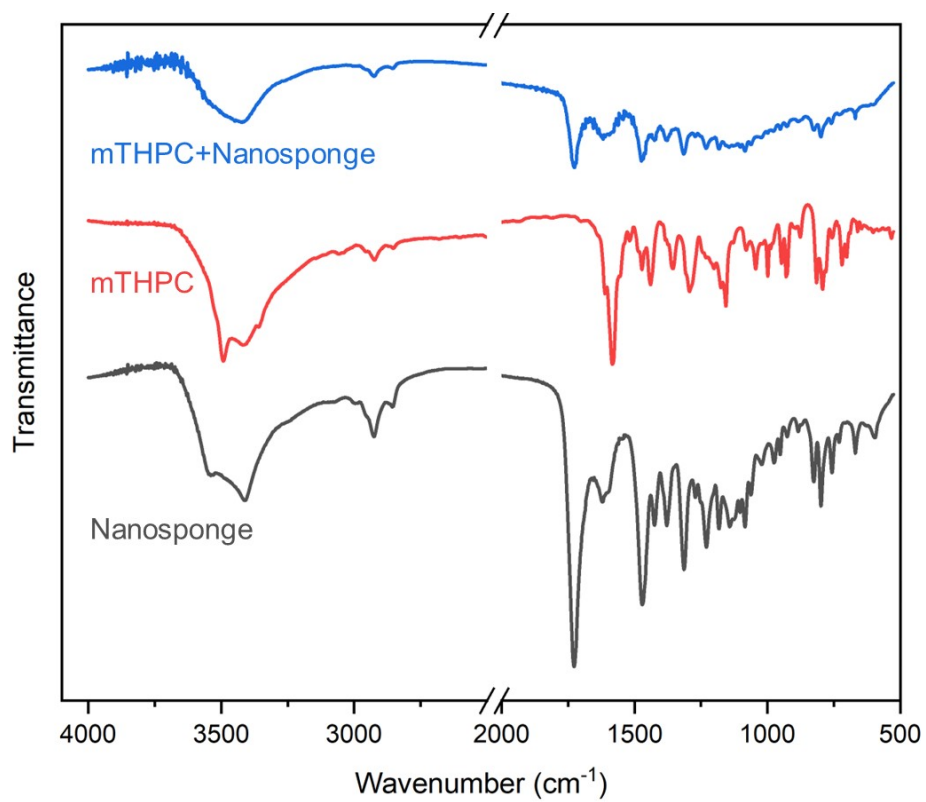

**Fig. S4.** Fourier transform infrared spectra of mTHPC, Nanosponge and mTHPC+Nanosponge.

## Host-Guest Chemistry

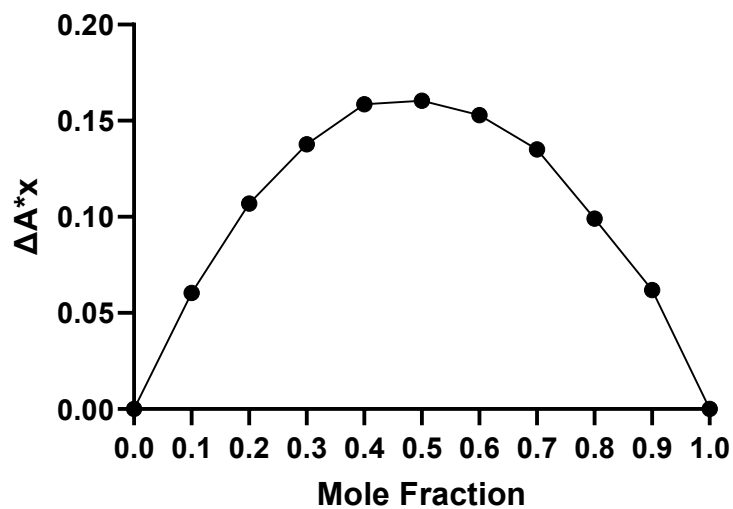

**Fig. S5.** Job plot ( $[\text{CB}[n] \text{ 1}] + [\text{mTHPC}] = 10 \mu\text{M}$ ) of mole fraction of acyclic  $\text{CB}[n] \text{ 1}$  versus  $\Delta A^* \chi$  at pH 7.4 (PBS).

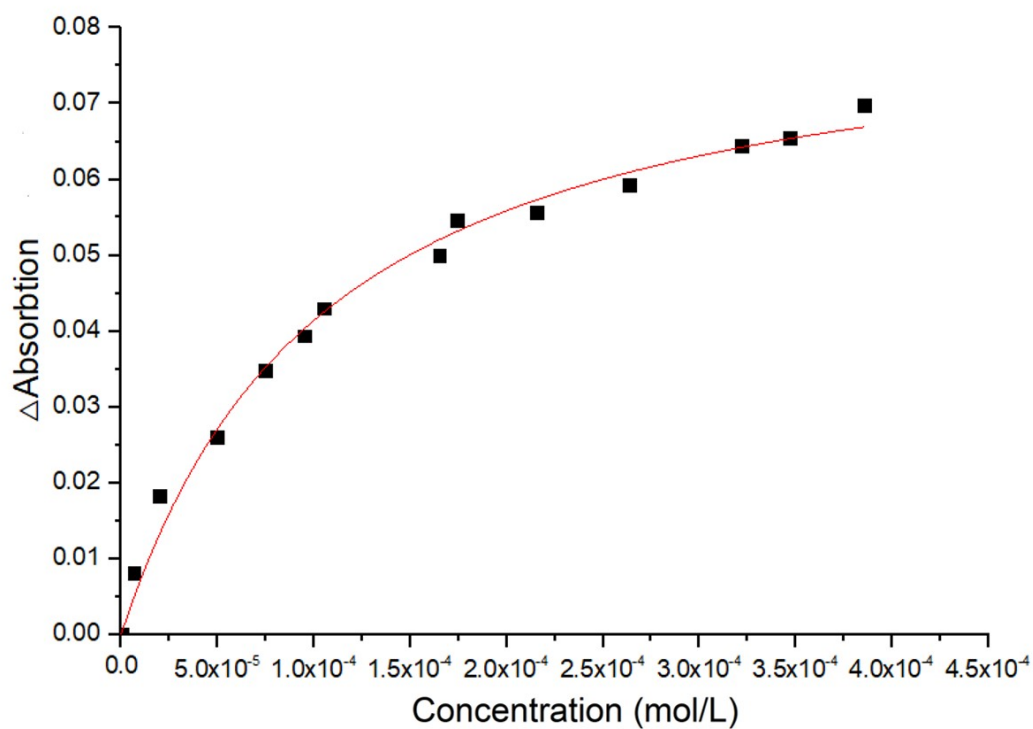

**Fig. S6.** Plot of the  $\Delta \text{Abs}$  (A-A0) at 425 nm as a function of the concentration of acyclic  $\text{CB}[n] \text{ 1}$ . The solid line represents the best non-linear fitting of the data based on a 1:1 binding model ( $K_a = (1.01 \pm 0.12) \times 10^4 \text{ M}^{-1}$ ).

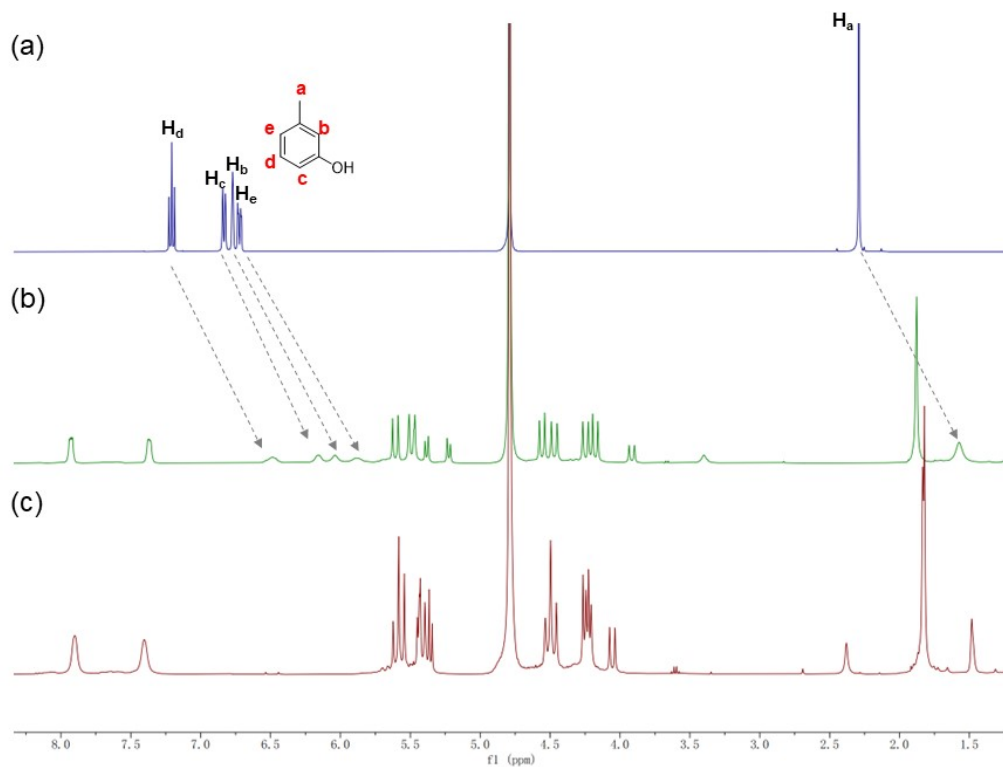

**Fig. S7.** <sup>1</sup>H NMR spectra recorded for (a) m-cresol (b) m-cresol and acyclic CB[n] 1 (c) acyclic CB[n] 1.

## *In Vitro* Study

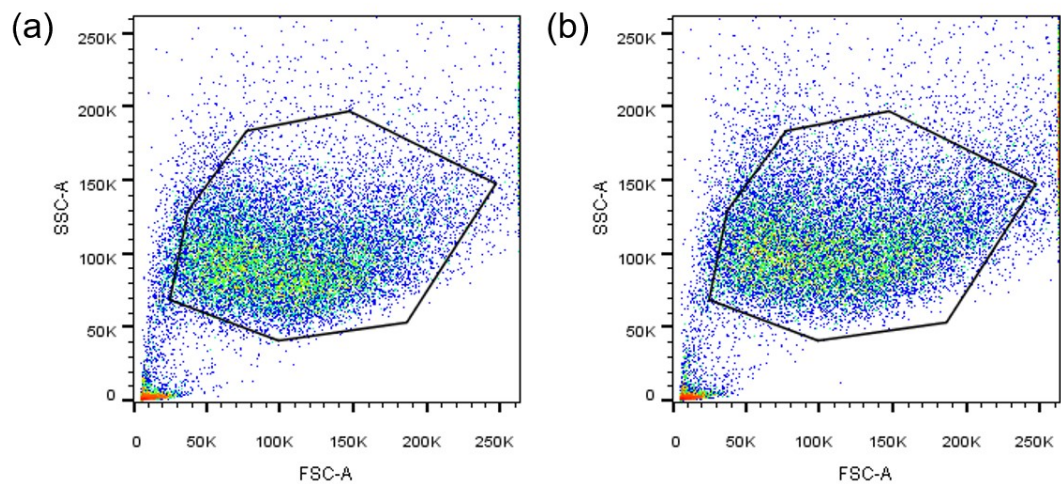

**Fig. S8** Flow cytometry of HeLa cells treated with (a) mTHPC and (b) mTHPC-loaded nanosponges.

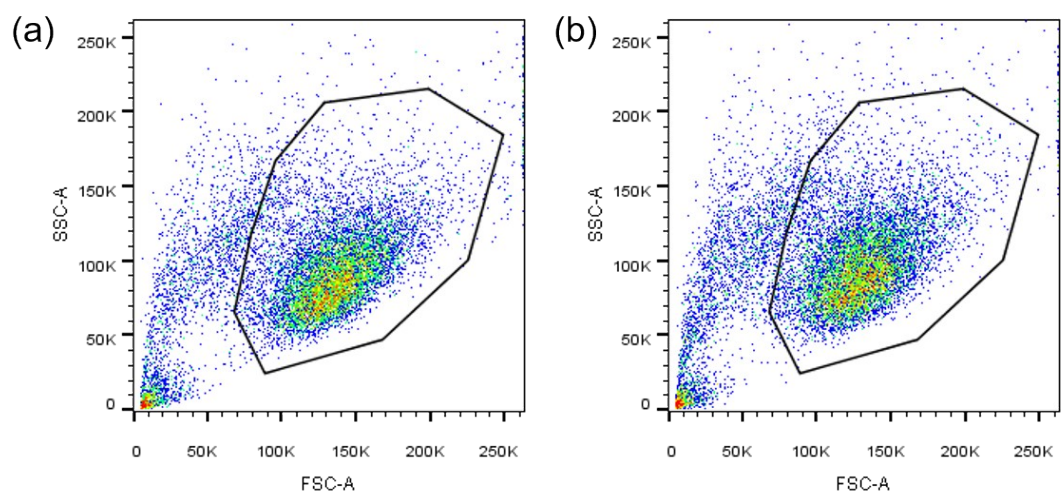

**Fig. S9** Flow cytometry of B16-F10 cells treated with (a) mTHPC and (b) mTHPC-loaded nanosponges.

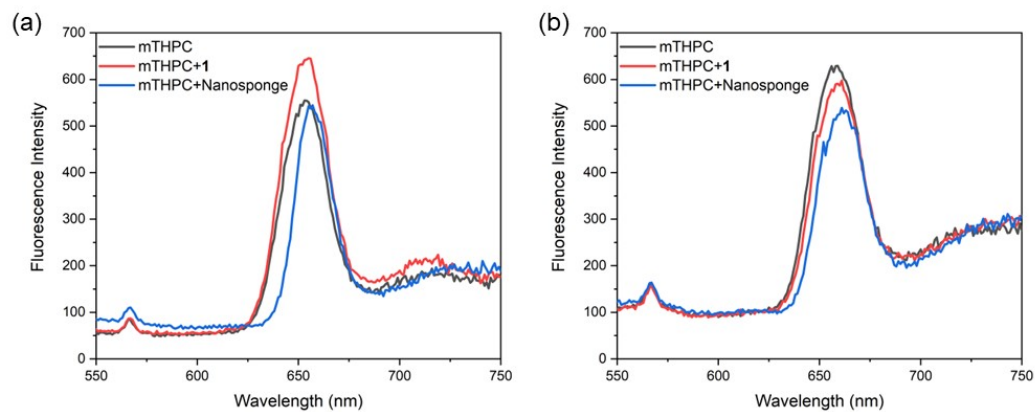

**Fig. S10.** (a) Fluorescence emission spectra of mTHPC, acyclic CB[n] **1** + mTHPC and mTHPC@nanosponge ( $[mTHPC] = 2 \mu M$ ,  $[1] = 15.6 \mu M$ ,  $[Nanosponge] = 0.02 \text{ mg/mL}$ , load ratio=6.8%). (b) Fluorescence emission spectra of mTHPC, acyclic CB[n] **1** + mTHPC and mTHPC@nanosponge ( $[mTHPC] = 10 \mu M$ ,  $[1] = 15.6 \mu M$ ,  $[Nanosponge] = 0.02 \text{ mg/mL}$ , load ratio=34%). Laser excitation : 405 nm.



*In Vivo Study*

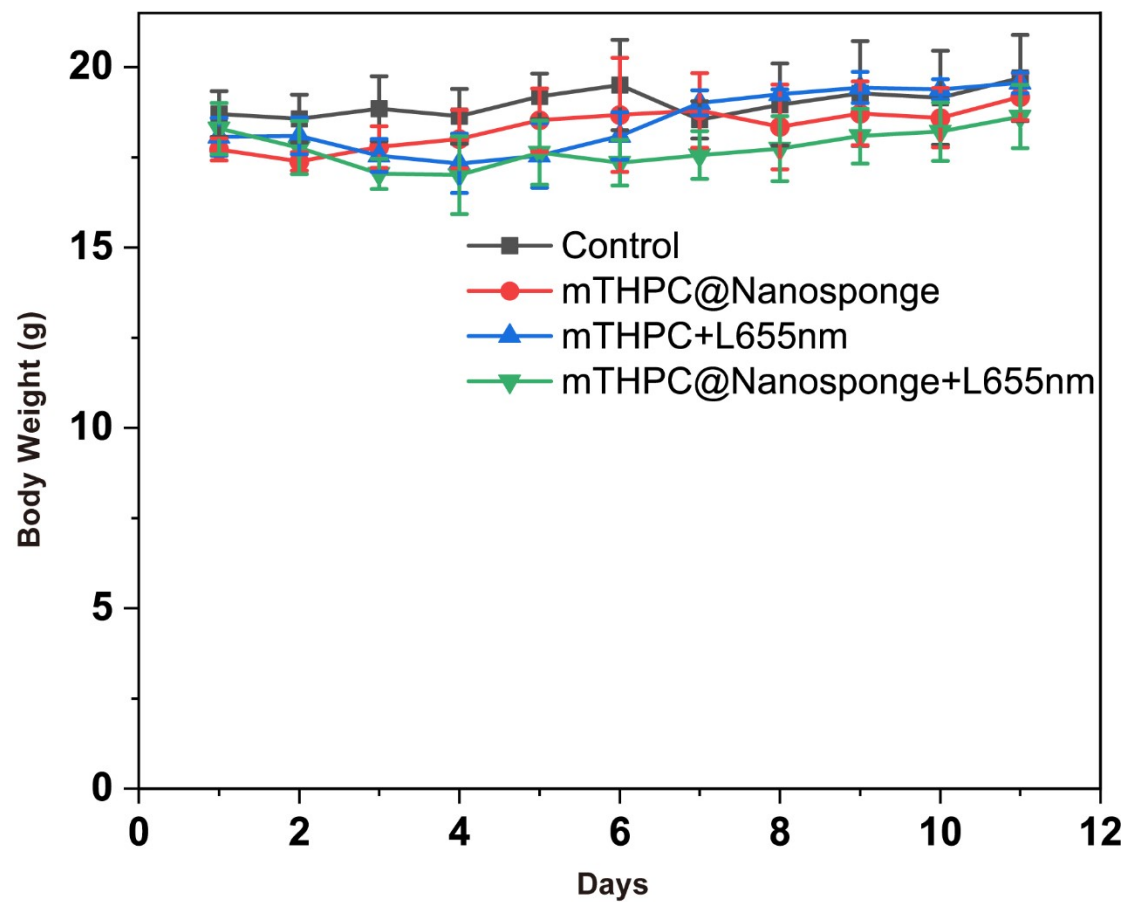

Fig. S11. The body weight variation of mice from each group.
